# Supplementary material for: A Comparison of Individual Learning and Social Learning in Zebrafish Through an Ethorobotics Approach
Source: PubMed Central journal article supplement (PMC7805697; doi:10.3389/frobt.2019.00071), 2019-08-14
Supplement: Data_Sheet_1.pdf [file Data_Sheet_1.pdf]

## Supplementary Material

### 1 SUPPLEMENTARY DATA

### 2 INTRODUCTION

This document replicates the analyses in the companion paper, and includes further analysis of zebrafish behavior. Section 4 provides an orientation to the data fields in files `TestData.csv` and `TrainingData.csv`, which contain all data analyzed in the companion paper and below. Sections 5 to 11 reproduce the analysis in the companion paper, with some additional details. Later sections show ANOVA tables for other behavioral measures, according to the independent variables of condition (social or individual training), correct door location (preferred or non-preferred), and test/trial number.

All ANOVAs refer to linear mixed models with subject as a random factor;  $p$  values have been computed with the `Anova` function of the `car` package within the R statistical environment (see main paper for references).

### 3 CONTENTS OF DATA PACKAGE

**TestData.csv:**Data collected during test trials.

**TrainingData.csv:**Data collected during training trials.

**data sheet 1.pdf:**This file.

**YangEtAl-ZebrafishLearning.org:**Emacs Org-mode source code for the analysis and for this file (Schulte et al., 2012; Dominik, 2010)

**YangEtAl-ZebrafishLearning.R:**R code for data analysis, extracted from YangEtAl-ZebrafishLearning.org.

### 4 DATA DESCRIPTION

The columns in `TestData.csv` and `TrainingData.csv` describe test and training conditions and results. Column meaning is described in the following table.

Table S1: Description of data columns.

|   | Column name | Description                                                   |
|---|-------------|---------------------------------------------------------------|
| 1 | FishId      | Subject Id within a batch                                     |
| 2 | Sex         | Subject sex                                                   |
| 3 | CorrectSide | Side of correct door from the point of view of the fish shoal |
| 4 | Trial/Test  | Trial or test number                                          |
| 5 | Time        | Time and date of experiment                                   |
| 6 | TrigTime    | Time at which door opening was triggered                      |
| 7 | PI          | Preference Index                                              |

Continued on next page

Continued from previous page

|    | Column name         | Description                                                                                                                  |
|----|---------------------|------------------------------------------------------------------------------------------------------------------------------|
| 8  | TimeR               | Time spent in a $6 \times 6$ cm region in front of the right door (from the point of view of an observer facing the subject) |
| 9  | TimeL               | Time spent in proximity of the left door                                                                                     |
| 10 | TimeRest            | Time spent elsewhere, until the subject triggers the door or the trial ends                                                  |
| 11 | Condition           | Experimental condition (social or individual training)                                                                       |
| 12 | Batch               | Experimental batch (1 or 2)                                                                                                  |
| 13 | GlobalId            | Subject Id unique to the whole data set                                                                                      |
| 14 | Entropy             | Entropy of the trajectory                                                                                                    |
| 15 | AveSpeed            | Average speed                                                                                                                |
| 16 | AvePeakSpeed        | Average peak speed across all test or training trials                                                                        |
| 17 | AveTravel           | Distance traveled                                                                                                            |
| 18 | AveCorrDoorDistance | Average distance to the correct door                                                                                         |
| 19 | AveWronDoorDistance | Average distance to the wrong door                                                                                           |
| 20 | AveDoorDisRatio     | Ratio of distances to the correct and wrong door                                                                             |
| 21 | AveRobotDistance    | Average distance from the final resting point of the robotic replica                                                         |
| 22 | WallTime1           | Time spent in proximity of wall 1                                                                                            |
| 23 | WallTime2           | Time spent in proximity of wall 2                                                                                            |
| 24 | WallTime3           | Time spent in proximity of wall 3                                                                                            |
| 25 | WallTime4           | Time spent in proximity of wall 4                                                                                            |
| 26 | WallTimeAll         | Time spent in proximity of any wall                                                                                          |
| 27 | FreezingTime        | Time spent moving more slowly than 2 cm/s                                                                                    |
| 28 | MovingTime          | Time spent moving faster than 2 cm/s                                                                                         |
| 29 | AveHeading          | Average subject's heading angle (0 represents heading toward the section housing conspecifics)                               |
| 30 | AveHeadingDoorAngle | Average angle between subject heading and the direction from the subject's centroid to the correct door                      |
| 31 | AveAngularSpeed     | Average turn rate                                                                                                            |
| 32 | AvePeakAngSpeed     | Average peak turn rate                                                                                                       |
| 33 | AveAcceleration     | Average acceleration across test or training trials                                                                          |
| 34 | AvePeakAcceler      | Average peak acceleration across test or training trials                                                                     |
| 35 | CorrectDoorLocation | Location of the correct door in the frame of reference of the experimental room                                              |
| 36 | Heading             | Absolute value of AveHeadingDoorAngle, transformed from radians to degrees                                                   |
| 37 | Avoidance           | Avoidance response for the door after it opened                                                                              |
| 38 | PI_m                | Modified preference index for the replica                                                                                    |

## 5 PREFERENCE INDEX AT TEST

ANOVA of Preference index shows improvement across tests, but independent of social or individual training (Fig. S1), and primarily limited to the preferred door location (Fig. S2).

**Table S2.** ANOVA of preference index. Here and in what follows bold number numbers identify statistically significant results.

|                                    | Chisq | Df | Pr(>Chisq)   |
|------------------------------------|-------|----|--------------|
| Condition                          | 0.82  | 1  | 0.364        |
| CorrectDoorLocation                | 1.44  | 1  | 0.230        |
| Test                               | 10.44 | 2  | <b>0.005</b> |
| Condition:CorrectDoorLocation      | 0.91  | 1  | 0.339        |
| Condition:Test                     | 2.10  | 2  | 0.350        |
| CorrectDoorLocation:Test           | 12.89 | 2  | <b>0.002</b> |
| Condition:CorrectDoorLocation:Test | 1.56  | 2  | 0.459        |

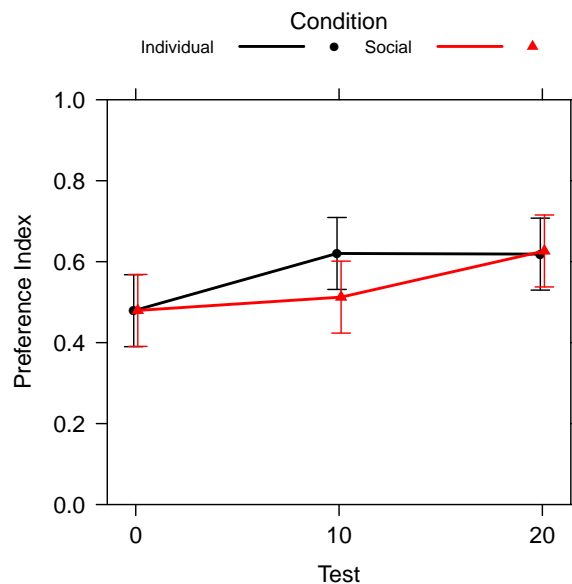

Figure S1: Preference index at test: non-significant difference of social vs. individual training. Bars are 95% confidence intervals.

### 5.1 Variability

Levene's test shows no significant difference in variability of preference index in the subject groups defined by different levels of independent variables in the ANOVA in Table S2:

Levene's test for homogeneity of variance (center = median)

| group | Df | F value | Pr(>F) |
|-------|----|---------|--------|
| 11    | 11 | 1.1343  | 0.3437 |
| 96    | 96 |         |        |

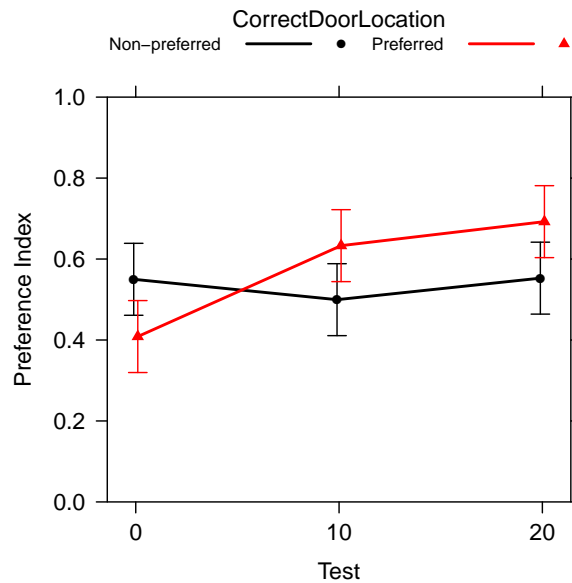

Figure S2: Preference index: significant interaction between correct door location and test. Bars are 95% confidence intervals.

## 6 HEADING AT TEST

ANOVA of heading direction at test shows the same pattern as Preference Index (Table S3, Fig. S3, Fig. S4).

Table S3. ANOVA of heading direction.

|                                    | Chisq | Df | Pr(>Chisq)   |
|------------------------------------|-------|----|--------------|
| Condition                          | 1.55  | 1  | 0.213        |
| CorrectDoorLocation                | 0.39  | 1  | 0.535        |
| Test                               | 14.30 | 2  | <b>0.001</b> |
| Condition:CorrectDoorLocation      | 8.02  | 1  | <b>0.005</b> |
| Condition:Test                     | 0.05  | 2  | 0.975        |
| CorrectDoorLocation:Test           | 8.45  | 2  | <b>0.015</b> |
| Condition:CorrectDoorLocation:Test | 0.07  | 2  | 0.964        |

### 6.1 Variability

Levene's test shows no difference in variability in heading direction in the ANOVA in Table S3:

Levene's test for homogeneity of variance (center = median)

```

Df F value Pr(>F)
group 11 0.3167 0.9806
96

```

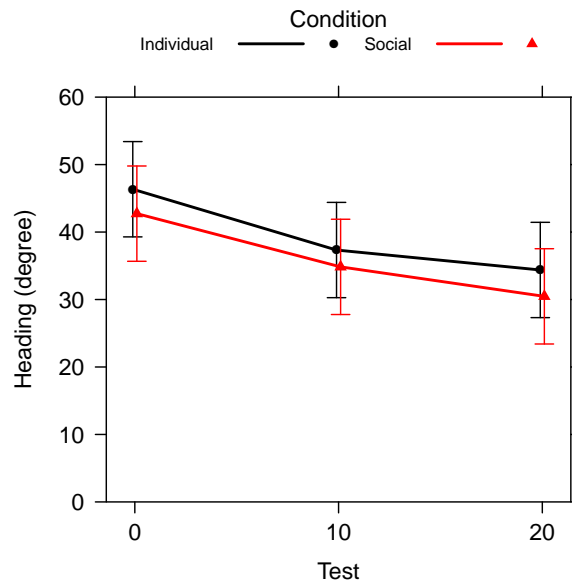

Figure S3: Heading direction at test: showing non-significant difference between social vs. individual training. Bars are 95% confidence intervals.

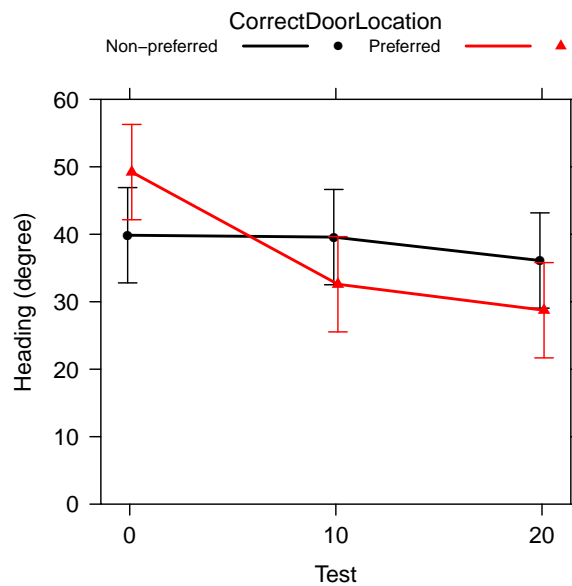

Figure S4: Heading direction at test: significant interaction between test and location of the correct door. Bars are 95% confidence intervals.

## 7 DOOR TRIGGERING TIME DURING TRAINING

ANOVA of door triggering time during training shows a significant effect of correct door location but no effect of training condition (social or individual) or trial number (Fig. S5).

Table S4. ANOVA of door triggering time.

|                                     | Chisq | Df | Pr(>Chisq)   |
|-------------------------------------|-------|----|--------------|
| Condition                           | 1.65  | 1  | 0.199        |
| Trial                               | 0.68  | 1  | 0.411        |
| CorrectDoorLocation                 | 8.88  | 1  | <b>0.003</b> |
| Condition:Trial                     | 0.06  | 1  | 0.799        |
| Condition:CorrectDoorLocation       | 0.09  | 1  | 0.762        |
| Trial:CorrectDoorLocation           | 2.82  | 1  | 0.093        |
| Condition:Trial:CorrectDoorLocation | 0.22  | 1  | 0.638        |

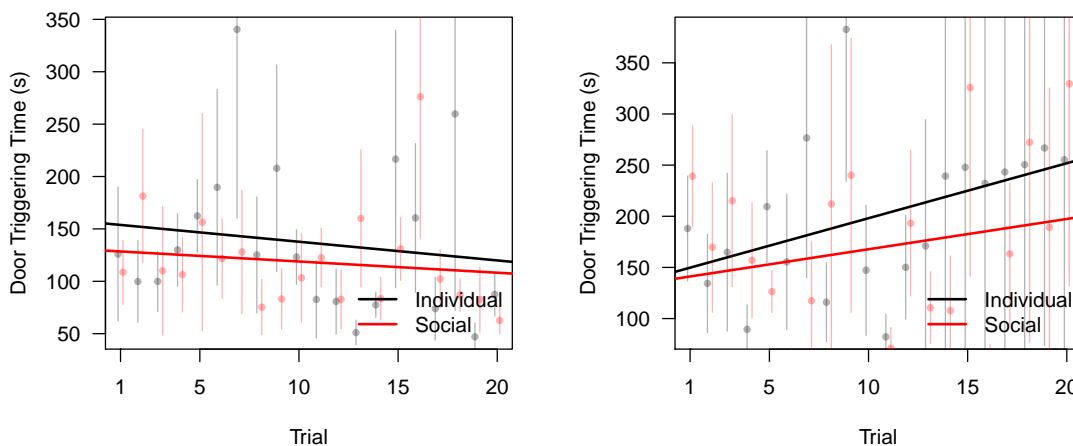

Figure S5: Changes in door triggering time with training, when the correct door is in the preferred location (left panel) or the non-preferred location (right-panel). Bars are standard errors.

### 7.1 Variability

Levene's test suggests a difference in variability of door triggering time in the subject groups defined by the condition and door location independent variables in the ANOVA in Table S4:

Levene's test for homogeneity of variance (center = median)

```

      Df F value Pr(>F)
group  3  3.5393 0.01444 *
      716

```

---

Signif. codes: 0 '\*\*\*' 0.001 '\*\*' 0.01 '\*' 0.05 '.' 0.1 ' ' 1

The difference lies primarily in higher variability when the door is in the preferred versus the non-preferred location (Fig. S6):

```
Condition CorrectDoorLocation var(TrigTime)
```

|               |               |           |
|---------------|---------------|-----------|
| 1: Individual | Non-preferred | 145305.97 |
| 2: Individual | Preferred     | 54733.68  |
| 3: Social     | Non-preferred | 90466.95  |
| 4: Social     | Preferred     | 24932.90  |

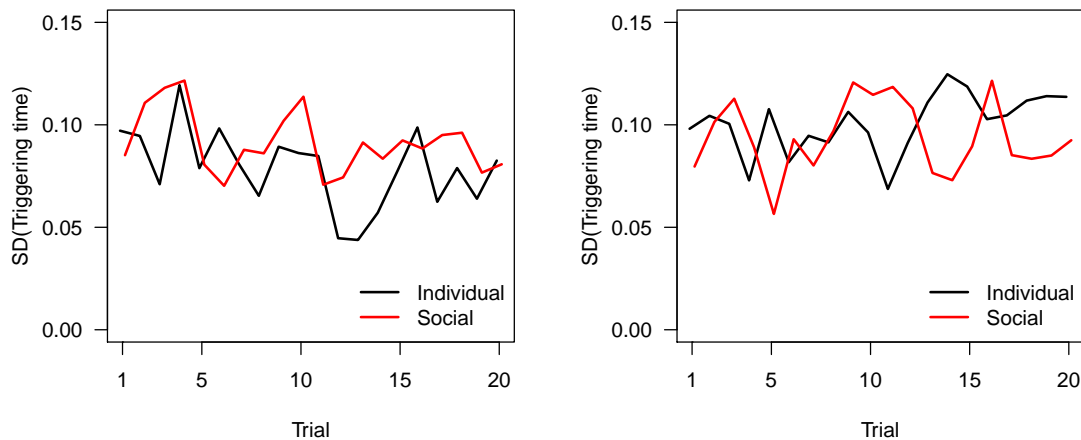

Figure S6: Standard deviation of triggering time through training, when the correct door is in the preferred location (left panel) or the non-preferred location (right-panel).

## 8 PREFERENCE INDEX DURING TRAINING

ANOVA of preference index shows an effect of location of the correct door, an effect of trials due to increasing preference, and an interaction between door location and condition.

Table S5. ANOVA of preference index during training.

|                                     | Chisq | Df | Pr(>Chisq)       |
|-------------------------------------|-------|----|------------------|
| Condition                           | 3.22  | 1  | 0.073            |
| Trial                               | 6.09  | 1  | <b>0.014</b>     |
| CorrectDoorLocation                 | 33.09 | 1  | <b>&lt;0.001</b> |
| Condition:Trial                     | 0.68  | 1  | 0.408            |
| Condition:CorrectDoorLocation       | 6.45  | 1  | <b>0.011</b>     |
| Trial:CorrectDoorLocation           | 0.46  | 1  | 0.496            |
| Condition:Trial:CorrectDoorLocation | 0.02  | 1  | 0.885            |

Visualization of the data shows that social training results in a smaller preference than individual training, although the difference is not significant (Fig. S7).

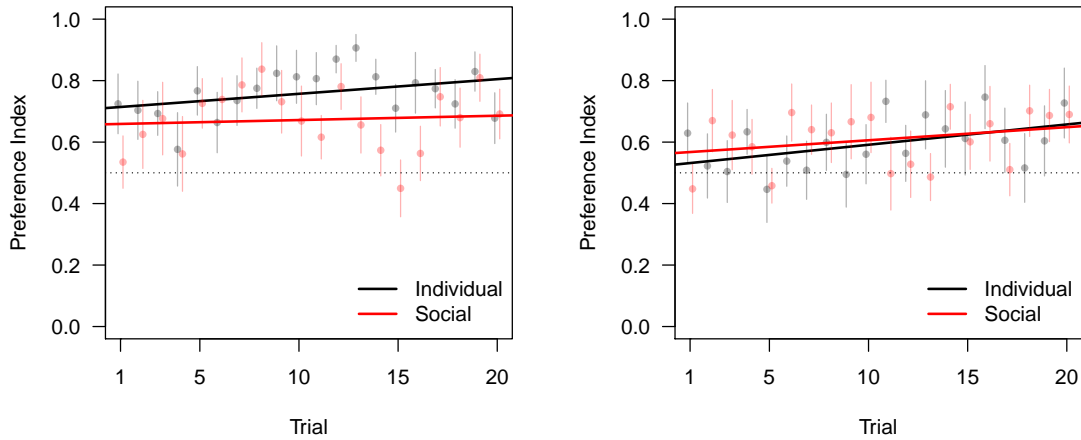

Figure S7: Changes in preference index with training, when the correct door is in the preferred location (left panel) or the non-preferred location (right-panel).

## 9 HEADING DURING TRAINING

ANOVA of heading during training shows a significant improvement over trials, a significant effect of correct door location, and an interaction between condition and correct door location (Table S6, Fig. S8). The latter signifies that social training was better than individual training when the door was on the preferred side, and worse when the door was on the non-preferred side.

Table S6. ANOVA of Heading during training.

|                                     | Chisq | Df | Pr(>Chisq)       |
|-------------------------------------|-------|----|------------------|
| Condition                           | 0.13  | 1  | 0.723            |
| Trial                               | 9.52  | 1  | <b>0.002</b>     |
| CorrectDoorLocation                 | 59.87 | 1  | <b>&lt;0.001</b> |
| Condition:Trial                     | 3.19  | 1  | 0.074            |
| Condition:CorrectDoorLocation       | 14.30 | 1  | <b>&lt;0.001</b> |
| Trial:CorrectDoorLocation           | 1.18  | 1  | 0.278            |
| Condition:Trial:CorrectDoorLocation | 1.16  | 1  | 0.281            |



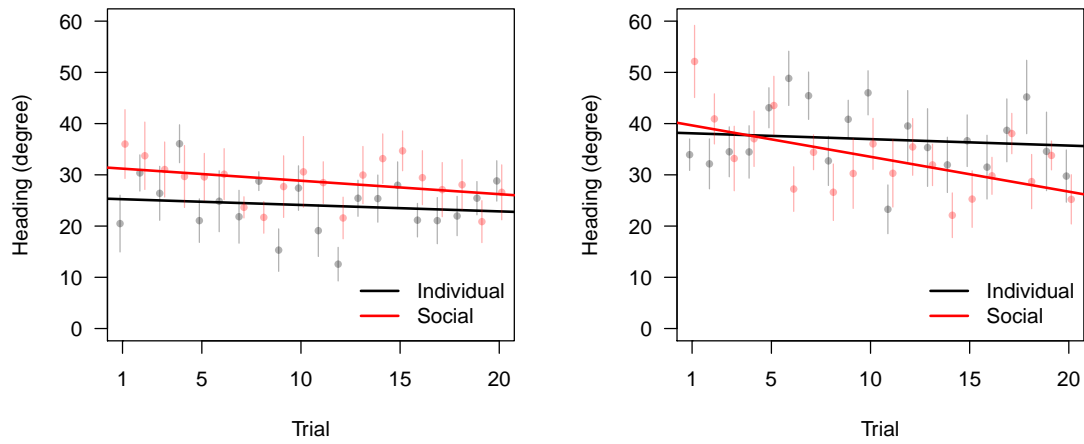

Figure S8: Changes in Heading with training, when the correct door is in the preferred location (left panel) or the non-preferred location (right-panel).

## 10 MODIFIED PREFERENCE INDEX FOR THE REPLICA AT TEST

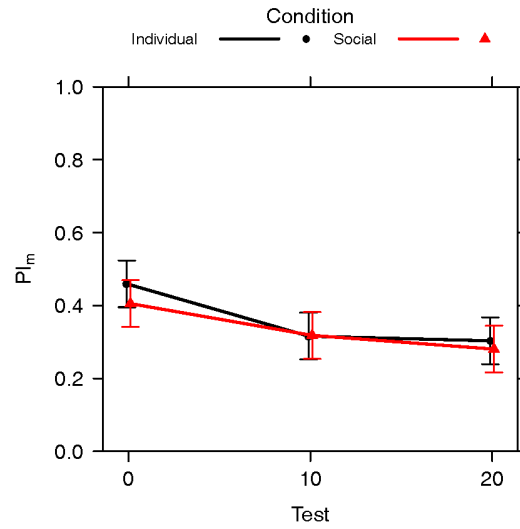

Figure S9: Modified preference index at test: significant on test. Bars are 95 % confidence intervals.

Table S7. ANOVA of PI<sub>m</sub> at test trials.

|                                    | Chisq | Df | Pr(>Chisq)     |
|------------------------------------|-------|----|----------------|
| Condition                          | 1.06  | 1  | 0.303          |
| Test                               | 25.45 | 2  | < <b>0.001</b> |
| CorrectDoorLocation                | 0.00  | 1  | 0.982          |
| Condition:Test                     | 0.90  | 2  | 0.637          |
| Condition:CorrectDoorLocation      | 3.39  | 1  | 0.066          |
| Test:CorrectDoorLocation           | 0.28  | 2  | 0.870          |
| Condition:Test:CorrectDoorLocation | 0.41  | 2  | 0.815          |

## 11 MODIFIED PREFERENCE INDEX FOR THE REPLICA DURING TRAINING

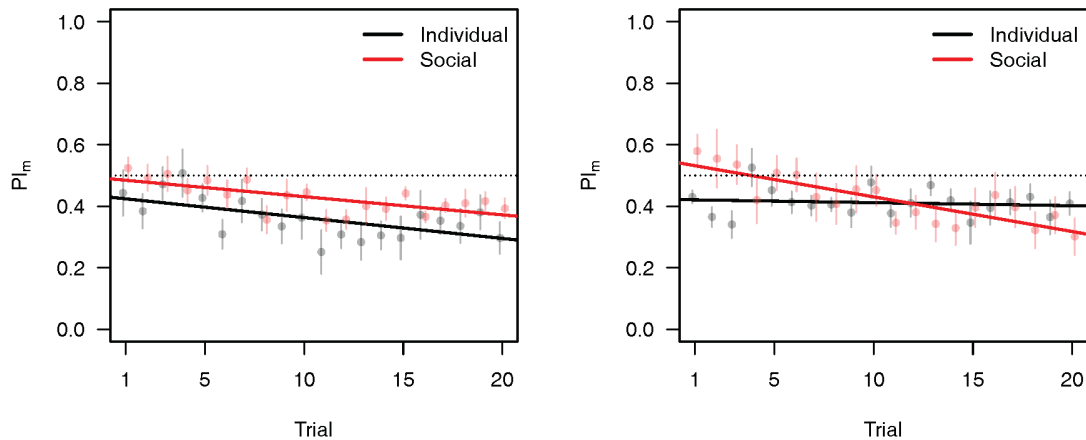

Figure S10: Modified preference index during training, when the correct door is in the preferred location (left panel) or the non-preferred location (right-panel).

Table S8. ANOVA of  $PI_m$  during training.

|                                     | Chisq | Df | Pr(>Chisq)     |
|-------------------------------------|-------|----|----------------|
| Condition                           | 11.95 | 1  | <b>0.001</b>   |
| Trial                               | 39.74 | 1  | < <b>0.001</b> |
| CorrectDoorLocation                 | 4.17  | 1  | 0.041          |
| Condition:Trial                     | 5.64  | 1  | <b>0.018</b>   |
| Condition:CorrectDoorLocation       | 5.76  | 1  | <b>0.016</b>   |
| Trial:CorrectDoorLocation           | 0.01  | 1  | 0.916          |
| Condition:Trial:CorrectDoorLocation | 7.88  | 1  | <b>0.005</b>   |

## 12 OTHER VARIABLES AT TEST

The following ANOVA tables relate the independent variables of condition (social/individual), correct door location (preferred/non-preferred), and test to the dependent variables listed in Section 4 that were not discussed above. The results are typically non-significant, especially for the difference between social and individual training.

The code for the following ANOVA is generated automatically (see R enclosed script), and non-significant interactions are not removed.

**Table S9.** ANOVA of Entropy across test trials.

|                                    | Chisq | Df | Pr(>Chisq) |
|------------------------------------|-------|----|------------|
| Condition                          | 0.63  | 1  | 0.429      |
| Test                               | 3.24  | 2  | 0.198      |
| CorrectDoorLocation                | 4.80  | 1  | 0.029      |
| Condition:Test                     | 1.37  | 2  | 0.504      |
| Condition:CorrectDoorLocation      | 0.62  | 1  | 0.432      |
| Test:CorrectDoorLocation           | 1.73  | 2  | 0.421      |
| Condition:Test:CorrectDoorLocation | 0.60  | 2  | 0.740      |

**Table S10.** ANOVA of AveSpeed across test trials.

|                                    | Chisq | Df | Pr(>Chisq) |
|------------------------------------|-------|----|------------|
| Condition                          | 0.62  | 1  | 0.432      |
| Test                               | 2.31  | 2  | 0.315      |
| CorrectDoorLocation                | 0.16  | 1  | 0.694      |
| Condition:Test                     | 1.04  | 2  | 0.594      |
| Condition:CorrectDoorLocation      | 0.06  | 1  | 0.807      |
| Test:CorrectDoorLocation           | 1.06  | 2  | 0.589      |
| Condition:Test:CorrectDoorLocation | 0.14  | 2  | 0.934      |

**Table S11.** ANOVA of AvePeakSpeed across test trials.

|                                    | Chisq | Df | Pr(>Chisq) |
|------------------------------------|-------|----|------------|
| Condition                          | 0.01  | 1  | 0.916      |
| Test                               | 0.17  | 2  | 0.917      |
| CorrectDoorLocation                | 0.59  | 1  | 0.444      |
| Condition:Test                     | 2.15  | 2  | 0.341      |
| Condition:CorrectDoorLocation      | 1.31  | 1  | 0.252      |
| Test:CorrectDoorLocation           | 1.35  | 2  | 0.508      |
| Condition:Test:CorrectDoorLocation | 1.02  | 2  | 0.602      |

**Table S12.** ANOVA of AveTravel across test trials.

|                                    | Chisq | Df | Pr(>Chisq) |
|------------------------------------|-------|----|------------|
| Condition                          | 0.62  | 1  | 0.430      |
| Test                               | 2.30  | 2  | 0.317      |
| CorrectDoorLocation                | 0.15  | 1  | 0.696      |
| Condition:Test                     | 1.04  | 2  | 0.593      |
| Condition:CorrectDoorLocation      | 0.06  | 1  | 0.809      |
| Test:CorrectDoorLocation           | 1.05  | 2  | 0.591      |
| Condition:Test:CorrectDoorLocation | 0.14  | 2  | 0.932      |

**Table S13.** ANOVA of AveCorrDoorDistance across test trials.

|                                    | Chisq | Df | Pr(>Chisq) |
|------------------------------------|-------|----|------------|
| Condition                          | 0.48  | 1  | 0.488      |
| Test                               | 1.09  | 2  | 0.579      |
| CorrectDoorLocation                | 0.00  | 1  | 0.989      |
| Condition:Test                     | 0.45  | 2  | 0.800      |
| Condition:CorrectDoorLocation      | 0.12  | 1  | 0.734      |
| Test:CorrectDoorLocation           | 1.20  | 2  | 0.550      |
| Condition:Test:CorrectDoorLocation | 1.84  | 2  | 0.399      |

**Table S14.** ANOVA of AveWronDoorDistance across test trials.

|                                    | Chisq | Df | Pr(>Chisq) |
|------------------------------------|-------|----|------------|
| Condition                          | 1.21  | 1  | 0.271      |
| Test                               | 16.12 | 2  | 0.000      |
| CorrectDoorLocation                | 4.40  | 1  | 0.036      |
| Condition:Test                     | 1.79  | 2  | 0.408      |
| Condition:CorrectDoorLocation      | 3.06  | 1  | 0.080      |
| Test:CorrectDoorLocation           | 10.94 | 2  | 0.004      |
| Condition:Test:CorrectDoorLocation | 2.58  | 2  | 0.276      |

**Table S15.** ANOVA of AveDoorDisRatio across test trials.

|                                    | Chisq | Df | Pr(>Chisq) |
|------------------------------------|-------|----|------------|
| Condition                          | 0.01  | 1  | 0.933      |
| Test                               | 7.34  | 2  | 0.026      |
| CorrectDoorLocation                | 1.89  | 1  | 0.169      |
| Condition:Test                     | 0.52  | 2  | 0.771      |
| Condition:CorrectDoorLocation      | 1.96  | 1  | 0.162      |
| Test:CorrectDoorLocation           | 16.56 | 2  | 0.000      |
| Condition:Test:CorrectDoorLocation | 0.50  | 2  | 0.779      |

Table S16. ANOVA of AveRobotDistance across test trials.

|                                    | Chisq | Df | Pr(>Chisq) |
|------------------------------------|-------|----|------------|
| Condition                          | 1.28  | 1  | 0.258      |
| Test                               | 12.55 | 2  | 0.002      |
| CorrectDoorLocation                | 1.99  | 1  | 0.159      |
| Condition:Test                     | 1.08  | 2  | 0.582      |
| Condition:CorrectDoorLocation      | 0.65  | 1  | 0.422      |
| Test:CorrectDoorLocation           | 2.30  | 2  | 0.317      |
| Condition:Test:CorrectDoorLocation | 3.05  | 2  | 0.218      |

Table S17. ANOVA of WallTime1 across test trials.

|                                    | Chisq | Df | Pr(>Chisq) |
|------------------------------------|-------|----|------------|
| Condition                          | 2.22  | 1  | 0.136      |
| Test                               | 22.56 | 2  | 0.000      |
| CorrectDoorLocation                | 2.86  | 1  | 0.091      |
| Condition:Test                     | 1.27  | 2  | 0.531      |
| Condition:CorrectDoorLocation      | 0.72  | 1  | 0.395      |
| Test:CorrectDoorLocation           | 0.96  | 2  | 0.618      |
| Condition:Test:CorrectDoorLocation | 1.47  | 2  | 0.479      |

Table S18. ANOVA of WallTime2 across test trials.

|                                    | Chisq | Df | Pr(>Chisq) |
|------------------------------------|-------|----|------------|
| Condition                          | 9.79  | 1  | 0.002      |
| Test                               | 2.59  | 2  | 0.274      |
| CorrectDoorLocation                | 0.18  | 1  | 0.667      |
| Condition:Test                     | 2.00  | 2  | 0.367      |
| Condition:CorrectDoorLocation      | 0.06  | 1  | 0.814      |
| Test:CorrectDoorLocation           | 1.46  | 2  | 0.482      |
| Condition:Test:CorrectDoorLocation | 0.93  | 2  | 0.627      |

Table S19. ANOVA of WallTime3 across test trials.

|                                    | Chisq | Df | Pr(>Chisq) |
|------------------------------------|-------|----|------------|
| Condition                          | 2.56  | 1  | 0.109      |
| Test                               | 2.39  | 2  | 0.303      |
| CorrectDoorLocation                | 2.24  | 1  | 0.134      |
| Condition:Test                     | 1.83  | 2  | 0.400      |
| Condition:CorrectDoorLocation      | 1.18  | 1  | 0.277      |
| Test:CorrectDoorLocation           | 2.30  | 2  | 0.317      |
| Condition:Test:CorrectDoorLocation | 3.41  | 2  | 0.182      |

**Table S20.** ANOVA of WallTime4 across test trials.

|                                    | Chisq | Df | Pr(>Chisq) |
|------------------------------------|-------|----|------------|
| Condition                          | 1.98  | 1  | 0.160      |
| Test                               | 0.83  | 2  | 0.659      |
| CorrectDoorLocation                | 1.10  | 1  | 0.294      |
| Condition:Test                     | 5.19  | 2  | 0.075      |
| Condition:CorrectDoorLocation      | 0.25  | 1  | 0.614      |
| Test:CorrectDoorLocation           | 0.75  | 2  | 0.687      |
| Condition:Test:CorrectDoorLocation | 1.26  | 2  | 0.532      |

**Table S21.** ANOVA of WallTimeAll across test trials.

|                                    | Chisq | Df | Pr(>Chisq) |
|------------------------------------|-------|----|------------|
| Condition                          | 0.12  | 1  | 0.731      |
| Test                               | 16.22 | 2  | 0.000      |
| CorrectDoorLocation                | 3.71  | 1  | 0.054      |
| Condition:Test                     | 3.21  | 2  | 0.201      |
| Condition:CorrectDoorLocation      | 0.12  | 1  | 0.725      |
| Test:CorrectDoorLocation           | 0.45  | 2  | 0.799      |
| Condition:Test:CorrectDoorLocation | 2.11  | 2  | 0.348      |

**Table S22.** ANOVA of FreezingTime across test trials.

|                                    | Chisq | Df | Pr(>Chisq) |
|------------------------------------|-------|----|------------|
| Condition                          | 0.00  | 1  | 0.957      |
| Test                               | 3.43  | 2  | 0.180      |
| CorrectDoorLocation                | 0.50  | 1  | 0.479      |
| Condition:Test                     | 0.68  | 2  | 0.711      |
| Condition:CorrectDoorLocation      | 3.58  | 1  | 0.059      |
| Test:CorrectDoorLocation           | 0.83  | 2  | 0.661      |
| Condition:Test:CorrectDoorLocation | 1.89  | 2  | 0.389      |

**Table S23.** ANOVA of MovingTime across test trials.

|                                    | Chisq | Df | Pr(>Chisq) |
|------------------------------------|-------|----|------------|
| Condition                          | 0.00  | 1  | 0.961      |
| Test                               | 3.41  | 2  | 0.182      |
| CorrectDoorLocation                | 0.51  | 1  | 0.477      |
| Condition:Test                     | 0.69  | 2  | 0.710      |
| Condition:CorrectDoorLocation      | 3.56  | 1  | 0.059      |
| Test:CorrectDoorLocation           | 0.82  | 2  | 0.664      |
| Condition:Test:CorrectDoorLocation | 1.90  | 2  | 0.386      |

**Supplementary Material**

---

**Table S24.** ANOVA of AveHeading across test trials.

|                                    | Chisq | Df | Pr(>Chisq) |
|------------------------------------|-------|----|------------|
| Condition                          | 6.88  | 1  | 0.009      |
| Test                               | 5.97  | 2  | 0.051      |
| CorrectDoorLocation                | 5.16  | 1  | 0.023      |
| Condition:Test                     | 0.52  | 2  | 0.772      |
| Condition:CorrectDoorLocation      | 2.36  | 1  | 0.125      |
| Test:CorrectDoorLocation           | 5.93  | 2  | 0.052      |
| Condition:Test:CorrectDoorLocation | 0.69  | 2  | 0.709      |

**Table S25.** ANOVA of AveHeadingDoorAngle across test trials.

|                                    | Chisq | Df | Pr(>Chisq) |
|------------------------------------|-------|----|------------|
| Condition                          | 5.37  | 1  | 0.021      |
| Test                               | 0.63  | 2  | 0.729      |
| CorrectDoorLocation                | 0.19  | 1  | 0.659      |
| Condition:Test                     | 0.84  | 2  | 0.658      |
| Condition:CorrectDoorLocation      | 0.24  | 1  | 0.626      |
| Test:CorrectDoorLocation           | 0.82  | 2  | 0.664      |
| Condition:Test:CorrectDoorLocation | 1.04  | 2  | 0.596      |

**Table S26.** ANOVA of AveAngularSpeed across test trials.

|                                    | Chisq | Df | Pr(>Chisq) |
|------------------------------------|-------|----|------------|
| Condition                          | 1.08  | 1  | 0.299      |
| Test                               | 28.85 | 2  | 0.000      |
| CorrectDoorLocation                | 2.80  | 1  | 0.094      |
| Condition:Test                     | 2.18  | 2  | 0.337      |
| Condition:CorrectDoorLocation      | 1.96  | 1  | 0.162      |
| Test:CorrectDoorLocation           | 0.22  | 2  | 0.895      |
| Condition:Test:CorrectDoorLocation | 1.12  | 2  | 0.570      |

**Table S27.** ANOVA of AvePeakAngSpeed across test trials.

|                                    | Chisq | Df | Pr(>Chisq) |
|------------------------------------|-------|----|------------|
| Condition                          | 1.06  | 1  | 0.302      |
| Test                               | 32.66 | 2  | 0.000      |
| CorrectDoorLocation                | 3.41  | 1  | 0.065      |
| Condition:Test                     | 2.18  | 2  | 0.336      |
| Condition:CorrectDoorLocation      | 1.94  | 1  | 0.164      |
| Test:CorrectDoorLocation           | 0.05  | 2  | 0.975      |
| Condition:Test:CorrectDoorLocation | 0.97  | 2  | 0.616      |



**Table S28.** ANOVA of AveAcceleration across test trials.

|                                    | Chisq | Df | Pr(>Chisq) |
|------------------------------------|-------|----|------------|
| Condition                          | 0.17  | 1  | 0.678      |
| Test                               | 12.84 | 2  | 0.002      |
| CorrectDoorLocation                | 0.92  | 1  | 0.338      |
| Condition:Test                     | 1.47  | 2  | 0.478      |
| Condition:CorrectDoorLocation      | 0.68  | 1  | 0.409      |
| Test:CorrectDoorLocation           | 0.59  | 2  | 0.744      |
| Condition:Test:CorrectDoorLocation | 0.30  | 2  | 0.862      |

**Table S29.** ANOVA of AvePeakAcceler across test trials.

|                                    | Chisq | Df | Pr(>Chisq) |
|------------------------------------|-------|----|------------|
| Condition                          | 0.50  | 1  | 0.479      |
| Test                               | 6.38  | 2  | 0.041      |
| CorrectDoorLocation                | 1.08  | 1  | 0.298      |
| Condition:Test                     | 4.24  | 2  | 0.120      |
| Condition:CorrectDoorLocation      | 0.00  | 1  | 0.949      |
| Test:CorrectDoorLocation           | 0.78  | 2  | 0.678      |
| Condition:Test:CorrectDoorLocation | 0.60  | 2  | 0.741      |

**Table S30.** ANOVA of Heading across test trials.

|                                    | Chisq | Df | Pr(>Chisq) |
|------------------------------------|-------|----|------------|
| Condition                          | 1.55  | 1  | 0.213      |
| Test                               | 14.30 | 2  | 0.001      |
| CorrectDoorLocation                | 0.39  | 1  | 0.535      |
| Condition:Test                     | 0.05  | 2  | 0.975      |
| Condition:CorrectDoorLocation      | 8.02  | 1  | 0.005      |
| Test:CorrectDoorLocation           | 8.45  | 2  | 0.015      |
| Condition:Test:CorrectDoorLocation | 0.07  | 2  | 0.964      |

### 13 OTHER VARIABLES DURING TRAINING

The following ANOVA tables relate the independent variables of condition (social/individual), correct door location (preferred/non-preferred), and trial to the dependent variables listed in Section 4 that were not discussed above. The results are typically non-significant, especially for the difference between social and individual training.

The code for the following ANOVA is generated automatically (see R enclosed script), and non-significant interactions are not removed.

**Table S31.** ANOVA of Entropy during training

|                                     | Chisq | Df | Pr(>Chisq) |
|-------------------------------------|-------|----|------------|
| Condition                           | 1.58  | 1  | 0.209      |
| Trial                               | 0.25  | 1  | 0.617      |
| CorrectDoorLocation                 | 31.96 | 1  | 0.000      |
| Condition:Trial                     | 2.34  | 1  | 0.126      |
| Condition:CorrectDoorLocation       | 43.59 | 1  | 0.000      |
| Trial:CorrectDoorLocation           | 7.66  | 1  | 0.006      |
| Condition:Trial:CorrectDoorLocation | 0.34  | 1  | 0.557      |

**Table S32.** ANOVA of AveSpeed during training

|                                     | Chisq | Df | Pr(>Chisq) |
|-------------------------------------|-------|----|------------|
| Condition                           | 1.41  | 1  | 0.235      |
| Trial                               | 10.67 | 1  | 0.001      |
| CorrectDoorLocation                 | 0.05  | 1  | 0.828      |
| Condition:Trial                     | 0.63  | 1  | 0.426      |
| Condition:CorrectDoorLocation       | 0.34  | 1  | 0.559      |
| Trial:CorrectDoorLocation           | 2.53  | 1  | 0.112      |
| Condition:Trial:CorrectDoorLocation | 2.11  | 1  | 0.146      |

**Table S33.** ANOVA of AvePeakSpeed during training

|                                     | Chisq | Df | Pr(>Chisq) |
|-------------------------------------|-------|----|------------|
| Condition                           | 0.00  | 1  | 0.947      |
| Trial                               | 7.03  | 1  | 0.008      |
| CorrectDoorLocation                 | 9.19  | 1  | 0.002      |
| Condition:Trial                     | 0.04  | 1  | 0.839      |
| Condition:CorrectDoorLocation       | 13.32 | 1  | 0.000      |
| Trial:CorrectDoorLocation           | 0.09  | 1  | 0.766      |
| Condition:Trial:CorrectDoorLocation | 0.66  | 1  | 0.417      |

**Table S34.** ANOVA of AveTravel during training

|                                     | Chisq | Df | Pr(>Chisq) |
|-------------------------------------|-------|----|------------|
| Condition                           | 2.84  | 1  | 0.092      |
| Trial                               | 4.21  | 1  | 0.040      |
| CorrectDoorLocation                 | 1.50  | 1  | 0.221      |
| Condition:Trial                     | 2.54  | 1  | 0.111      |
| Condition:CorrectDoorLocation       | 3.04  | 1  | 0.081      |
| Trial:CorrectDoorLocation           | 0.82  | 1  | 0.364      |
| Condition:Trial:CorrectDoorLocation | 0.03  | 1  | 0.857      |

**Table S35.** ANOVA of AveCorrDoorDistance during training

|                                     | Chisq | Df | Pr(>Chisq) |
|-------------------------------------|-------|----|------------|
| Condition                           | 7.46  | 1  | 0.006      |
| Trial                               | 2.08  | 1  | 0.150      |
| CorrectDoorLocation                 | 2.21  | 1  | 0.137      |
| Condition:Trial                     | 4.45  | 1  | 0.035      |
| Condition:CorrectDoorLocation       | 5.20  | 1  | 0.023      |
| Trial:CorrectDoorLocation           | 1.14  | 1  | 0.286      |
| Condition:Trial:CorrectDoorLocation | 1.40  | 1  | 0.237      |

**Table S36.** ANOVA of AveWronDoorDistance during training

|                                     | Chisq  | Df | Pr(>Chisq) |
|-------------------------------------|--------|----|------------|
| Condition                           | 16.48  | 1  | 0.000      |
| Trial                               | 2.35   | 1  | 0.125      |
| CorrectDoorLocation                 | 118.62 | 1  | 0.000      |
| Condition:Trial                     | 3.58   | 1  | 0.058      |
| Condition:CorrectDoorLocation       | 3.93   | 1  | 0.047      |
| Trial:CorrectDoorLocation           | 0.02   | 1  | 0.884      |
| Condition:Trial:CorrectDoorLocation | 0.67   | 1  | 0.414      |

**Table S37.** ANOVA of AveDoorDisRatio during training

|                                     | Chisq | Df | Pr(>Chisq) |
|-------------------------------------|-------|----|------------|
| Condition                           | 0.33  | 1  | 0.568      |
| Trial                               | 0.94  | 1  | 0.331      |
| CorrectDoorLocation                 | 6.51  | 1  | 0.011      |
| Condition:Trial                     | 0.49  | 1  | 0.486      |
| Condition:CorrectDoorLocation       | 2.23  | 1  | 0.135      |
| Trial:CorrectDoorLocation           | 0.61  | 1  | 0.435      |
| Condition:Trial:CorrectDoorLocation | 0.22  | 1  | 0.637      |

Table S38. ANOVA of AveRobotDistance during training

|                                     | Chisq | Df | Pr(>Chisq) |
|-------------------------------------|-------|----|------------|
| Condition                           | 19.29 | 1  | 0.000      |
| Trial                               | 0.01  | 1  | 0.928      |
| CorrectDoorLocation                 | 60.70 | 1  | 0.000      |
| Condition:Trial                     | 7.38  | 1  | 0.007      |
| Condition:CorrectDoorLocation       | 0.05  | 1  | 0.823      |
| Trial:CorrectDoorLocation           | 0.69  | 1  | 0.405      |
| Condition:Trial:CorrectDoorLocation | 0.09  | 1  | 0.764      |

Table S39. ANOVA of WallTime1 during training

|                                     | Chisq | Df | Pr(>Chisq) |
|-------------------------------------|-------|----|------------|
| Condition                           | 1.66  | 1  | 0.198      |
| Trial                               | 11.91 | 1  | 0.001      |
| CorrectDoorLocation                 | 3.02  | 1  | 0.082      |
| Condition:Trial                     | 1.16  | 1  | 0.282      |
| Condition:CorrectDoorLocation       | 2.59  | 1  | 0.108      |
| Trial:CorrectDoorLocation           | 0.77  | 1  | 0.382      |
| Condition:Trial:CorrectDoorLocation | 0.09  | 1  | 0.764      |

Table S40. ANOVA of WallTime2 during training

|                                     | Chisq | Df | Pr(>Chisq) |
|-------------------------------------|-------|----|------------|
| Condition                           | 6.34  | 1  | 0.012      |
| Trial                               | 3.79  | 1  | 0.052      |
| CorrectDoorLocation                 | 4.00  | 1  | 0.046      |
| Condition:Trial                     | 4.52  | 1  | 0.033      |
| Condition:CorrectDoorLocation       | 3.75  | 1  | 0.053      |
| Trial:CorrectDoorLocation           | 3.20  | 1  | 0.074      |
| Condition:Trial:CorrectDoorLocation | 3.06  | 1  | 0.080      |

Table S41. ANOVA of WallTime3 during training

|                                     | Chisq | Df | Pr(>Chisq) |
|-------------------------------------|-------|----|------------|
| Condition                           | 0.11  | 1  | 0.743      |
| Trial                               | 0.04  | 1  | 0.845      |
| CorrectDoorLocation                 | 0.08  | 1  | 0.783      |
| Condition:Trial                     | 0.78  | 1  | 0.376      |
| Condition:CorrectDoorLocation       | 0.02  | 1  | 0.890      |
| Trial:CorrectDoorLocation           | 0.04  | 1  | 0.842      |
| Condition:Trial:CorrectDoorLocation | 0.50  | 1  | 0.481      |

**Table S42.** ANOVA of WallTime4 during training

|                                     | Chisq | Df | Pr(>Chisq) |
|-------------------------------------|-------|----|------------|
| Condition                           | 9.45  | 1  | 0.002      |
| Trial                               | 0.10  | 1  | 0.750      |
| CorrectDoorLocation                 | 6.06  | 1  | 0.014      |
| Condition:Trial                     | 0.02  | 1  | 0.880      |
| Condition:CorrectDoorLocation       | 2.82  | 1  | 0.093      |
| Trial:CorrectDoorLocation           | 0.00  | 1  | 0.947      |
| Condition:Trial:CorrectDoorLocation | 0.03  | 1  | 0.872      |

**Table S43.** ANOVA of WallTimeAll during training

|                                     | Chisq | Df | Pr(>Chisq) |
|-------------------------------------|-------|----|------------|
| Condition                           | 2.27  | 1  | 0.131      |
| Trial                               | 0.00  | 1  | 0.996      |
| CorrectDoorLocation                 | 1.98  | 1  | 0.159      |
| Condition:Trial                     | 1.24  | 1  | 0.266      |
| Condition:CorrectDoorLocation       | 1.27  | 1  | 0.260      |
| Trial:CorrectDoorLocation           | 0.66  | 1  | 0.417      |
| Condition:Trial:CorrectDoorLocation | 1.01  | 1  | 0.314      |

**Table S44.** ANOVA of FreezingTime during training

|                                     | Chisq | Df | Pr(>Chisq) |
|-------------------------------------|-------|----|------------|
| Condition                           | 0.42  | 1  | 0.519      |
| Trial                               | 10.58 | 1  | 0.001      |
| CorrectDoorLocation                 | 15.26 | 1  | 0.000      |
| Condition:Trial                     | 1.48  | 1  | 0.223      |
| Condition:CorrectDoorLocation       | 3.42  | 1  | 0.064      |
| Trial:CorrectDoorLocation           | 8.80  | 1  | 0.003      |
| Condition:Trial:CorrectDoorLocation | 0.81  | 1  | 0.367      |

**Table S45.** ANOVA of MovingTime during training

|                                     | Chisq | Df | Pr(>Chisq) |
|-------------------------------------|-------|----|------------|
| Condition                           | 2.00  | 1  | 0.158      |
| Trial                               | 6.96  | 1  | 0.008      |
| CorrectDoorLocation                 | 0.07  | 1  | 0.796      |
| Condition:Trial                     | 1.13  | 1  | 0.288      |
| Condition:CorrectDoorLocation       | 8.01  | 1  | 0.005      |
| Trial:CorrectDoorLocation           | 0.65  | 1  | 0.422      |
| Condition:Trial:CorrectDoorLocation | 0.09  | 1  | 0.766      |

Table S46. ANOVA of AveHeading during training

|                                     | Chisq | Df | Pr(>Chisq) |
|-------------------------------------|-------|----|------------|
| Condition                           | 3.27  | 1  | 0.071      |
| Trial                               | 0.01  | 1  | 0.928      |
| CorrectDoorLocation                 | 0.06  | 1  | 0.800      |
| Condition:Trial                     | 12.25 | 1  | 0.000      |
| Condition:CorrectDoorLocation       | 4.53  | 1  | 0.033      |
| Trial:CorrectDoorLocation           | 0.36  | 1  | 0.547      |
| Condition:Trial:CorrectDoorLocation | 0.00  | 1  | 0.967      |

Table S47. ANOVA of AveHeadingDoorAngle during training

|                                     | Chisq | Df | Pr(>Chisq) |
|-------------------------------------|-------|----|------------|
| Condition                           | 6.44  | 1  | 0.011      |
| Trial                               | 0.86  | 1  | 0.353      |
| CorrectDoorLocation                 | 13.58 | 1  | 0.000      |
| Condition:Trial                     | 4.24  | 1  | 0.040      |
| Condition:CorrectDoorLocation       | 7.50  | 1  | 0.006      |
| Trial:CorrectDoorLocation           | 1.02  | 1  | 0.311      |
| Condition:Trial:CorrectDoorLocation | 1.23  | 1  | 0.268      |

Table S48. ANOVA of AveAngularSpeed during training

|                                     | Chisq | Df | Pr(>Chisq) |
|-------------------------------------|-------|----|------------|
| Condition                           | 13.18 | 1  | 0.000      |
| Trial                               | 0.59  | 1  | 0.442      |
| CorrectDoorLocation                 | 11.47 | 1  | 0.001      |
| Condition:Trial                     | 6.42  | 1  | 0.011      |
| Condition:CorrectDoorLocation       | 0.77  | 1  | 0.381      |
| Trial:CorrectDoorLocation           | 0.66  | 1  | 0.417      |
| Condition:Trial:CorrectDoorLocation | 0.87  | 1  | 0.351      |

Table S49. ANOVA of AvePeakAngSpeed during training

|                                     | Chisq | Df | Pr(>Chisq) |
|-------------------------------------|-------|----|------------|
| Condition                           | 1.14  | 1  | 0.285      |
| Trial                               | 1.86  | 1  | 0.172      |
| CorrectDoorLocation                 | 20.37 | 1  | 0.000      |
| Condition:Trial                     | 7.38  | 1  | 0.007      |
| Condition:CorrectDoorLocation       | 2.45  | 1  | 0.117      |
| Trial:CorrectDoorLocation           | 0.23  | 1  | 0.628      |
| Condition:Trial:CorrectDoorLocation | 0.12  | 1  | 0.724      |

**Table S50.** ANOVA of AveAcceleration during training

|                                     | Chisq | Df | Pr(>Chisq) |
|-------------------------------------|-------|----|------------|
| Condition                           | 7.68  | 1  | 0.006      |
| Trial                               | 5.43  | 1  | 0.020      |
| CorrectDoorLocation                 | 1.49  | 1  | 0.222      |
| Condition:Trial                     | 0.35  | 1  | 0.557      |
| Condition:CorrectDoorLocation       | 0.00  | 1  | 0.988      |
| Trial:CorrectDoorLocation           | 0.47  | 1  | 0.492      |
| Condition:Trial:CorrectDoorLocation | 0.78  | 1  | 0.376      |

**Table S51.** ANOVA of AvePeakAcceler during training

|                                     | Chisq | Df | Pr(>Chisq) |
|-------------------------------------|-------|----|------------|
| Condition                           | 2.07  | 1  | 0.151      |
| Trial                               | 0.58  | 1  | 0.447      |
| CorrectDoorLocation                 | 5.41  | 1  | 0.020      |
| Condition:Trial                     | 0.12  | 1  | 0.730      |
| Condition:CorrectDoorLocation       | 3.57  | 1  | 0.059      |
| Trial:CorrectDoorLocation           | 0.11  | 1  | 0.737      |
| Condition:Trial:CorrectDoorLocation | 0.00  | 1  | 0.979      |

**Table S52.** ANOVA of Heading during training

|                                     | Chisq | Df | Pr(>Chisq) |
|-------------------------------------|-------|----|------------|
| Condition                           | 0.13  | 1  | 0.723      |
| Trial                               | 9.52  | 1  | 0.002      |
| CorrectDoorLocation                 | 59.87 | 1  | 0.000      |
| Condition:Trial                     | 3.19  | 1  | 0.074      |
| Condition:CorrectDoorLocation       | 14.30 | 1  | 0.000      |
| Trial:CorrectDoorLocation           | 1.18  | 1  | 0.278      |
| Condition:Trial:CorrectDoorLocation | 1.16  | 1  | 0.281      |

## **REFERENCES**

- Dominik, C. (2010). *The Org Mode 7 Reference Manual-Organize your life with GNU Emacs* (Network Theory Ltd.)
- Schulte, E., Davison, D., Dye, T., Dominik, C., et al. (2012). A multi-language computing environment for literate programming and reproducible research. *Journal of Statistical Software* 46, 1–24
